# Supplementary material for: C-isolated Ag–C–Co sandwich sphere-nanostructures and their high activity catalysis induced by surface plasmon resonance
Source: Royal Society of Chemistry journal article supplement (doi:10.1039/c3nr01614e), 2013-01-01
Supplement: c3nr01614e.pdf [file c3nr01614e.pdf]

## Electronic Supplementary Information (ESI)

### C-isolated Ag-C-Co Sandwich Sphere-structures and Their Highly Activity Catalysis Induced by Surface Plasmon Resonance

*Bo Zhou<sup>a</sup>, Ming Wen<sup>a,b\*</sup>, Qingsheng Wu<sup>a,b</sup>*

<sup>a</sup>Department of Chemistry; State Key Laboratory of Pollution Control and Resource Reuse, Tongji University, Shanghai 200092, China;

<sup>b</sup>Shanghai Key Lab Development & Application of Metal Function Material, Tongji University, Shanghai, China

#### **Corresponding author:**

\*E-mail: [m\\_wen@tongji.edu.cn](mailto:m_wen@tongji.edu.cn) (Ming WEN);

Tel: +86-21-65982653 Ex. 8544; Fax: +86-21-65981097

**Table S1.** Saturation magnetization ( $M_s$ ) and retentivity ( $M_r$ ) as well as coercivity ( $H_c$ ) of Ag-C-Co nanospheres, Ag-Co nanospheres and Co nanospheres.

| Magnetic parameters | Ag-C-Co | Ag-Co  | Co      |
|---------------------|---------|--------|---------|
| $M_s$ (emu/g)       | 31.833  | 27.623 | 140.84  |
| $M_r$ (emu/g)       | 1.3205  | 1.4100 | 10.4200 |
| $H_c$ (Oe)          | 109.95  | 111.17 | 137.07  |



**Figure S1.** Simplified graphic of experimental devices for hydrogen generation from the hydrolysis reaction of NaBH<sub>4</sub> solution: 1. iron stand; 2. reactor flask; 3. water bath; 4. magnetic stirrer; 5. 98% concentrated H<sub>2</sub>SO<sub>4</sub> solution; 6. water container; 7. measuring cylinder.



**Figure S2.** The SEM of Ag-C-Co nanospheres images obtained at reaction time of (A) 2 min, (B) 10 min and (C) 30 min.



**Figure S3.** UV-Vis at reaction time of (a) 2 min, (b) 10 min and (c) 30 min of Ag-C-Co sandwich sphere-structures.



**Figure S4.** SEM of Co small particles on magnifying surface of Ag-C-Co of 200 nm.



**Figure S5.** FT-IR spectrum of Ag-C nanoparticles.



**Figure S6.** SEM images of Ag-C-Co nanospheres in absence of NaOH.



**Figure S7.** SEM images of Ag-C-Co nanospheres prepared in different molar ratio of PVP: $M^{2+}$ : (A) 9:1; (B) 18:1; (C) 36:1.



**Figure S8.** SEM images of Ag-C-Co nanospheres prepared in the different reaction time at 450 K: (A) 30 min; (B) 90 min; (C) 180 min. The surface of the samples became enclose as the reaction time prolonged.



**Figure S9.** SEM images: (A) Ag nanospheres at ~200 nm; (B) Ag-Co nanospheres at ~200 nm.



**Figure S10.** Co nanospheres: (A) SEM images; (B) XRD pattern; (C) EDS analysis (Cu is from the TEM grid).



**Figure S11.** SEM images: (A) C nanospheres; (B) C-Co nanospheres.



**Figure S12.** SEM images of Ag-C nanospheres of different size: (A1) 50 nm; (B1) 100 nm; (C1) 250 nm and corresponding Ag-C-Co sandwich sphere-structures of different size: (A2) 170 nm; (B2) 400 nm; (C2) 750 nm. TEM images of Ag-C-Co sandwich sphere-structures of different size: (A3) 170 nm; (B3) 400 nm; (C3) 750 nm.



**Figure S13.** Hydrogen generation from above AB aqueous solution catalyzed by Ag-C-Co sandwich sphere-nanostructures of different size: (a) 170 nm, (b) 400 nm, (c) 600 nm, (d) 750 nm under atmospheric pressure at r.t..



**Figure S14.** Hydrogen generation from AB aqueous solution (0.13 M, 20 mL) catalyzed by Ag-C-Co sandwich sphere-nanostructures in reaction temperatures at (1) 328 K, (2) 318 K, (3) 308 K, (4) 298 K, (5) 288 K.



**Figure S15.** Hydrogen generation from above AB aqueous solution catalyzed by Ag-C-Co sandwich sphere-nanostructures from the 1<sup>st</sup> to 5<sup>th</sup> run of the lifetime experiment under atmospheric pressure at r.t..
